# Supplementary material for: Highly efficient hybrid light-emitting transistors incorporating MoOx/Ag/MoOx semi-transparent electrodes
Source: Royal Society of Chemistry journal article supplement (doi:10.1039/d1tc04674h), 2021-12-07
Supplement: d1tc04674h1.pdf [file d1tc04674h1.pdf]

**Supporting Information for:**

**Highly Efficient Hybrid Light-Emitting Transistors incorporating  
MoO<sub>x</sub>/Ag/MoO<sub>x</sub> Semi-Transparent Electrodes**

Yu Jung Park,<sup>a</sup> Ae Ran Song,<sup>b</sup> Kwun-Bum Chung,<sup>b</sup> Tae-Youb Kim,<sup>c</sup> Bright Walker\*<sup>d</sup> and Jung  
Hwa Seo\*<sup>a</sup>

*<sup>a</sup>Department of Semiconductors, Dong-A University, Busan, 49315, Republic of Korea*

*<sup>b</sup>Division of Physics and Semiconductor Science, Dongguk University, Seoul, 04620,  
Republic of Korea*

*<sup>c</sup>Reality Devices Research Division, Electronics and Telecommunications Research Institute,  
Daejeon, 34129, Republic of Korea.*

*<sup>d</sup>Department of Chemistry, Kyung Hee University, Seoul, 02447, Republic of Korea*

# 1. Electrical and optical output characteristics of HLETs with OMO electrodes

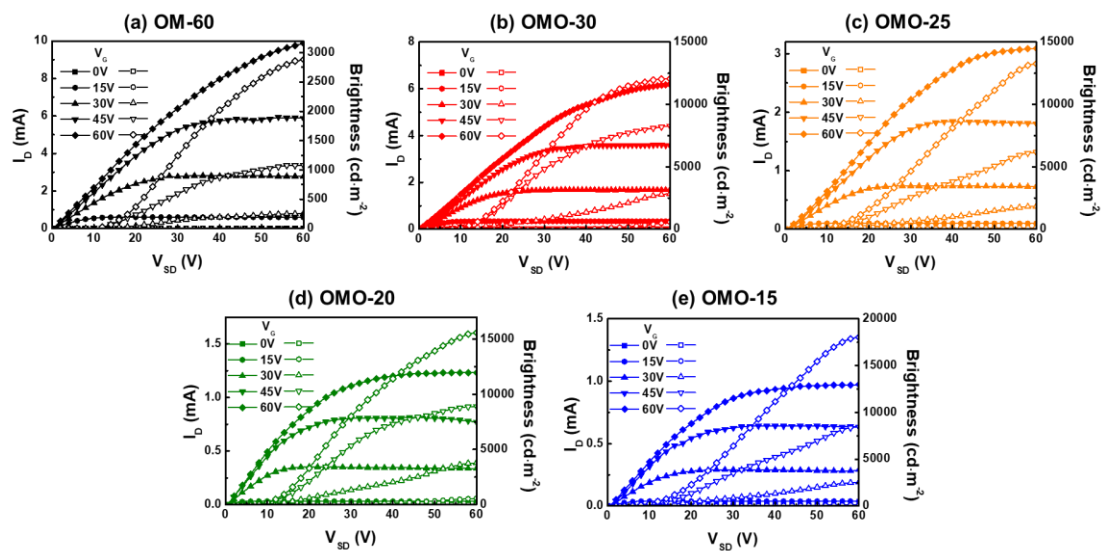

**Figure S1.** Electrical and optical output characteristics of HLETs with OMO electrodes as a function of Ag thicknesses (60, 30, 25, 20 and 15 nm, respectively.)
